# Supplementary material
Source: Research Square preprint supplement (doi:10.21203/rs.3.rs-10276892/v1)
Supplement: Supplementary file 1 [file a8d9d8ead9ba51ee0418b476.docx]

# Appendix A: Implementation Note — Normalization Consistency

Appendix A maps a critical, frequently overlooked hazard in walk-forward evaluation pipelines: the normalization-consistency pitfall. In high-dimensional feature regimes, even a subtle asynchronous misalignment between training statistics and inference preprocessing can artificially contaminate backtest signals. An earlier version of this pipeline applied z-score normalization during training but fed raw features during evaluation, producing a non-uniform bias across folds that inflated some Sharpe ratios and depressed others. After enforcing strict parameter continuity between optimization and inference windows, Sharpe values became more conservative (Hybrid from 1.871 to 1.520) but statistically more reliable (p from 0.039 to 0.016)—a counterintuitive outcome reinforcing that preprocessing consistency is a prerequisite, not a refinement. We formalize the following tracking framework for walk-forward robustness: always persist and reuse normalization statistics from the training window; validate by feeding a training sample through the evaluation pipeline and comparing outputs before running the full backtest.

On-chain features such as realised_cap_log (~27) and mempool_size (~millions) were particularly susceptible to this misalignment: fed as raw values through a model whose weights were optimized for z-scored inputs, their scale differential produced a non-uniform bias across the eight folds. After correction, the Hybrid and LSTM Sharpe values both dropped, but the improvement signal strengthened—a pattern consistent with the removal of structured noise rather than the loss of genuine predictive signal.
